# Supplementary material
Source: ML conference proceedings conference paper supplement (https://openaccess.thecvf.com/content/CVPR2025/html/Zhang_GaussianSpa_An_Optimizing-Sparsifying_CVPR_2025_paper.html)
Supplement: Supplementary file 1 [file Zhang_GaussianSpa_An_Optimizing-Sparsifying_CVPR_2025_supplemental.pdf]

# GaussianSpa: An “Optimizing-Sparsifying” Simplification Framework for Compact and High-Quality 3D Gaussian Splatting

## Supplementary Material

### 7. Additional Results

#### 7.1. Additional Quantitative Results

We summarize additional quantitative results on the Mip-NeRF 360, Tanks&Temples, and Deep Blending datasets in Table 3, Table 4, and Table 5, respectively. We plot additional PSNR-#Gaussians curves on diverse Scenes in Figure 14, in comparison with Mini-Splatting [17] and LightGaussian [16]. It can be observed that with the same number of Gaussians, our GaussianSpa shows superior rendering outcomes.

#### 7.2. Additional Visual Quality Results

Figure 10 and Figure 11 provide additional rendered images comparing GaussianSpa with LightGaussian [16], Mini-Splatting [17], and original 3DGS on various scenes. Those additional results demonstrate our GaussianSpa achieves stronger representational power for background and detail-rich areas such as walls, carpets, and ladders, showcasing superior rendering qualities. Furthermore, Figure 12 and Figure 13 offer additional rendered Gaussian ellipsoids and point cloud views, respectively. These results further illustrate that GaussianSpa creates a high-quality sparse 3D representation that adaptively uses more Gaussians to represent high-frequency areas.

### 8. Additional Discussion

**Convergence Analysis.** We analyze the convergence behavior of GaussianSpa by examining the effects of hyperparameters such as  $\delta$ , which controls the sparsity strength in Eq. 10, and the interval at which the “sparsifying” step is performed, as described in Section 3. Figure 9 shows loss curves for various  $\delta$  and interval values, indicating similar convergence rates during our “optimizing-sparsifying”-integrated training process. After removing “zero” Gaussians at iteration 25K, the loss curve continues to converge consistently, confirming GaussianSpa’s feasibility.

| Method             | PSNR $\uparrow$ | SSIM $\uparrow$ | LPIPS $\downarrow$ | Storage $\downarrow$ |
|--------------------|-----------------|-----------------|--------------------|----------------------|
| EfficientGS [28]   | 27.38           | 0.817           | 0.216              | 98 MB                |
| LightGaussian [16] | 27.28           | 0.805           | 0.243              | 42 MB                |
| <b>GaussianSpa</b> | <b>27.85</b>    | <b>0.825</b>    | <b>0.214</b>       | <b>25 MB</b>         |

Table 2. **Storage comparison evaluated on the Mip-NeRF 360 dataset.** GaussianSpa’s storage cost is reported based on the add-on compression methods (i.e., SH distillation and vector quantization) from LightGaussian [16].

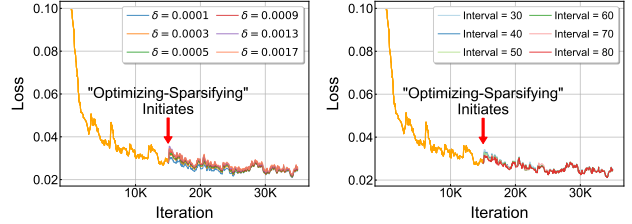

Figure 9. **Loss curves with multiple (left)  $\delta$  and (right) interval settings.** The curves show that GaussianSpa exhibits a good convergence behavior in the “optimizing-sparsifying”-integrated training process.

| Scene    | Method         | PSNR $\uparrow$ | SSIM $\uparrow$ | LPIPS $\downarrow$ | # G (M) $\downarrow$ |
|----------|----------------|-----------------|-----------------|--------------------|----------------------|
| Bicycle  | 3DGS           | 25.13           | 0.750           | <b>0.240</b>       | 5.310                |
|          | Mini-Splatting | 25.21           | 0.760           | 0.247              | <b>0.646</b>         |
|          | GaussianSpa    | <b>25.44</b>    | <b>0.769</b>    | 0.246              | 0.656                |
| Bonsai   | 3DGS           | 32.19           | <b>0.950</b>    | 0.180              | 1.250                |
|          | Mini-Splatting | 31.73           | 0.945           | 0.180              | <b>0.360</b>         |
|          | GaussianSpa    | <b>32.40</b>    | 0.947           | <b>0.174</b>       | 0.372                |
| Counter  | 3DGS           | 29.11           | 0.910           | 0.180              | 1.170                |
|          | Mini-Splatting | 28.53           | 0.911           | 0.184              | 0.408                |
|          | GaussianSpa    | <b>29.23</b>    | <b>0.919</b>    | <b>0.176</b>       | <b>0.392</b>         |
| Flowers  | 3DGS           | 21.37           | 0.590           | 0.360              | 3.470                |
|          | Mini-Splatting | 21.42           | <b>0.616</b>    | 0.336              | <b>0.670</b>         |
|          | GaussianSpa    | <b>21.75</b>    | 0.610           | <b>0.329</b>       | 0.674                |
| Garden   | 3DGS           | <b>27.32</b>    | <b>0.860</b>    | <b>0.120</b>       | 5.690                |
|          | Mini-Splatting | 26.99           | 0.842           | 0.156              | 0.738                |
|          | GaussianSpa    | 27.26           | 0.848           | 0.151              | <b>0.728</b>         |
| Kitchen  | 3DGS           | 31.53           | 0.930           | 0.120              | 1.770                |
|          | Mini-Splatting | 31.24           | 0.929           | 0.122              | 0.438                |
|          | GaussianSpa    | <b>32.03</b>    | <b>0.934</b>    | <b>0.117</b>       | <b>0.423</b>         |
| Room     | 3DGS           | 31.59           | 0.920           | 0.200              | 1.500                |
|          | Mini-Splatting | 31.44           | 0.929           | 0.193              | 0.394                |
|          | GaussianSpa    | <b>32.04</b>    | <b>0.933</b>    | <b>0.188</b>       | <b>0.355</b>         |
| Stump    | 3DGS           | 26.73           | 0.770           | 0.240              | 4.420                |
|          | Mini-Splatting | 27.35           | 0.803           | 0.219              | 0.717                |
|          | GaussianSpa    | <b>27.56</b>    | <b>0.808</b>    | <b>0.218</b>       | <b>0.690</b>         |
| Treehill | 3DGS           | 22.61           | 0.640           | 0.350              | 3.420                |
|          | Mini-Splatting | 22.69           | 0.652           | 0.332              | 0.663                |
|          | GaussianSpa    | <b>22.94</b>    | <b>0.660</b>    | <b>0.329</b>       | <b>0.637</b>         |
| Average  | 3DGS           | 27.45           | 0.810           | 0.220              | 3.110                |
|          | Mini-Splatting | 27.40           | 0.821           | 0.219              | 0.559                |
|          | GaussianSpa    | <b>27.85</b>    | <b>0.825</b>    | <b>0.214</b>       | <b>0.547</b>         |

Table 3. MiP-NeRF360 per scene results. 3DGS results are reported from [19]. Mini-Splatting [17] results are replicated using official code.

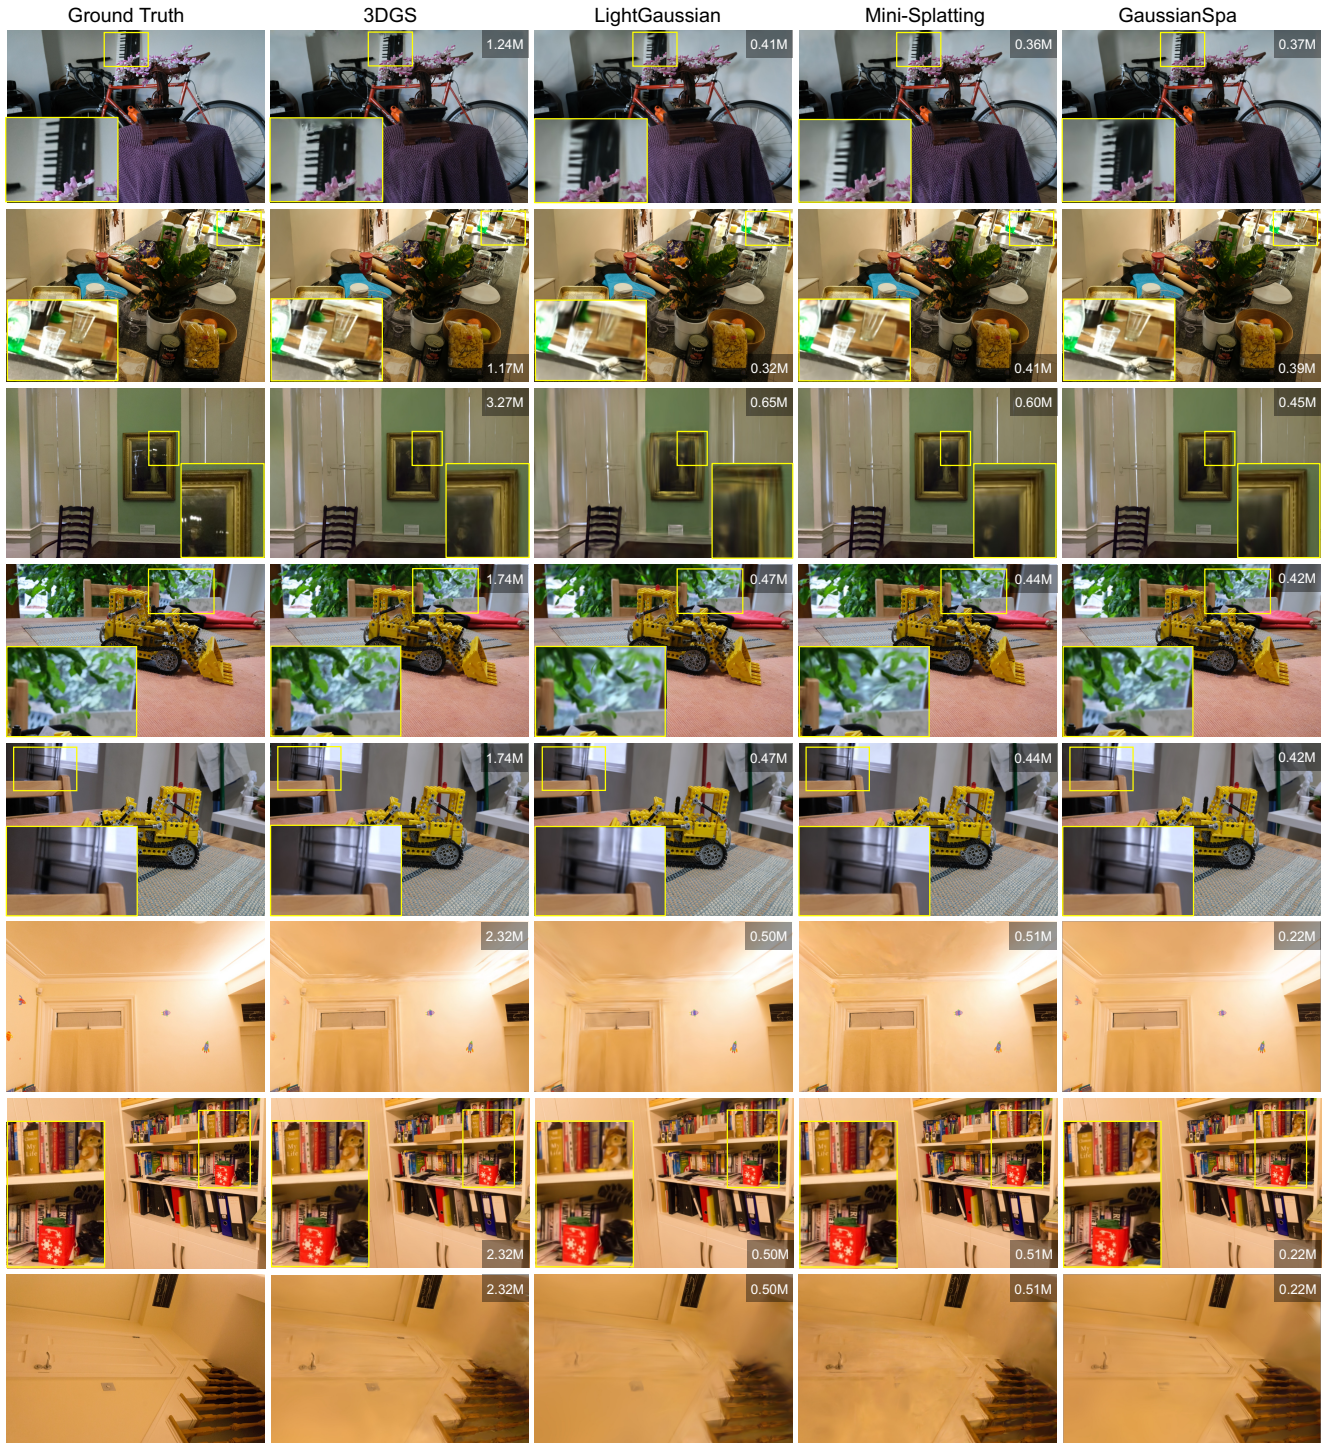

Figure 10. Additional visual comparison on more scenes. The numbers of remaining Gaussians in millions are displayed.



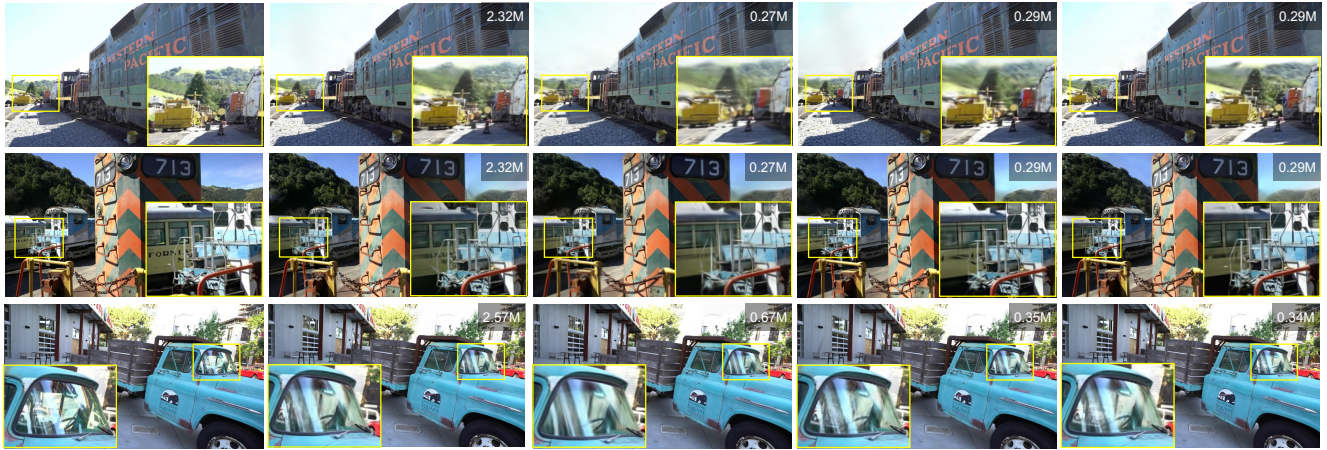

Figure 11. (Continue) Additional visual comparison on more scenes. The numbers of remaining Gaussians in millions are displayed.

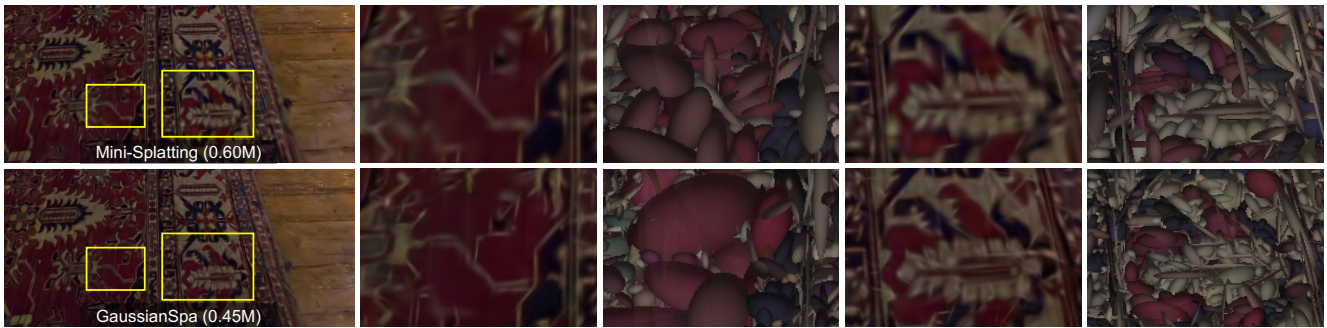

Figure 12. Additional visualized Gaussian ellipsoids. The numbers of remaining Gaussians in millions are displayed.

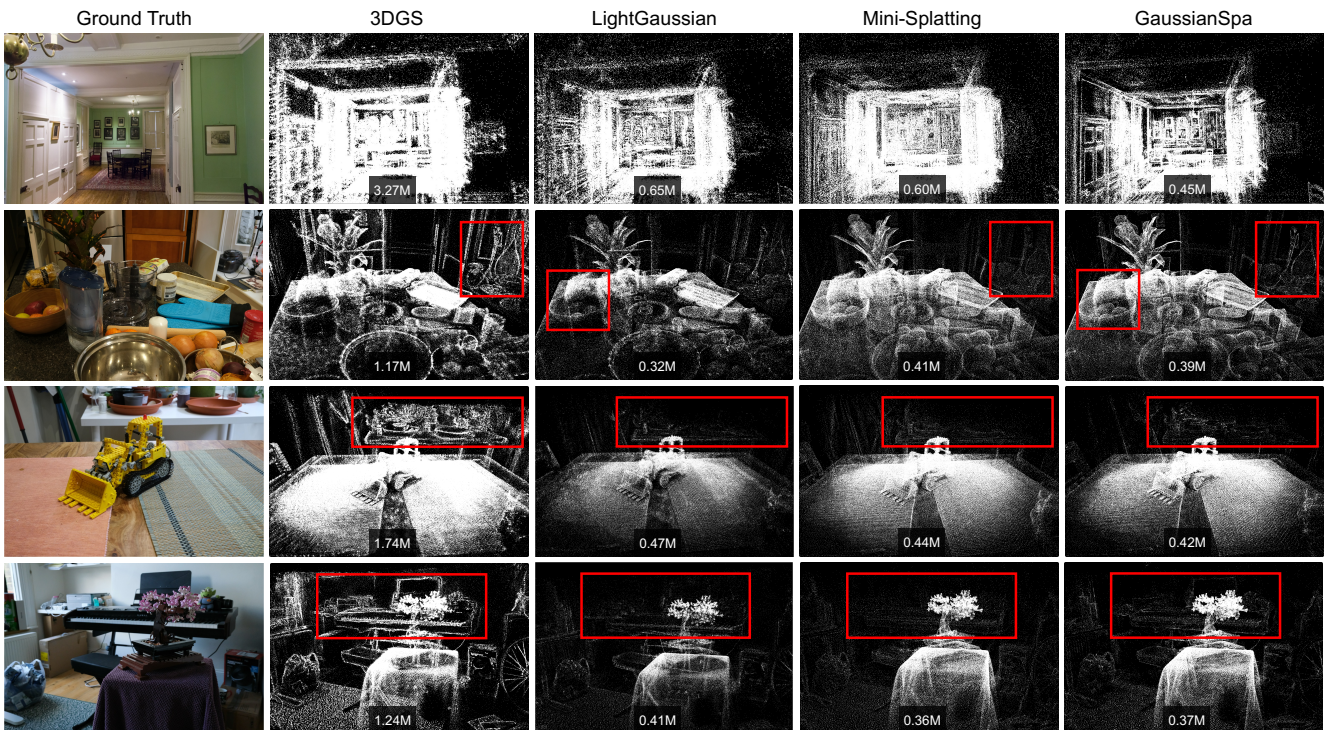

Figure 13. Additional visualized point clouds. The numbers of remaining Gaussians in millions are displayed.



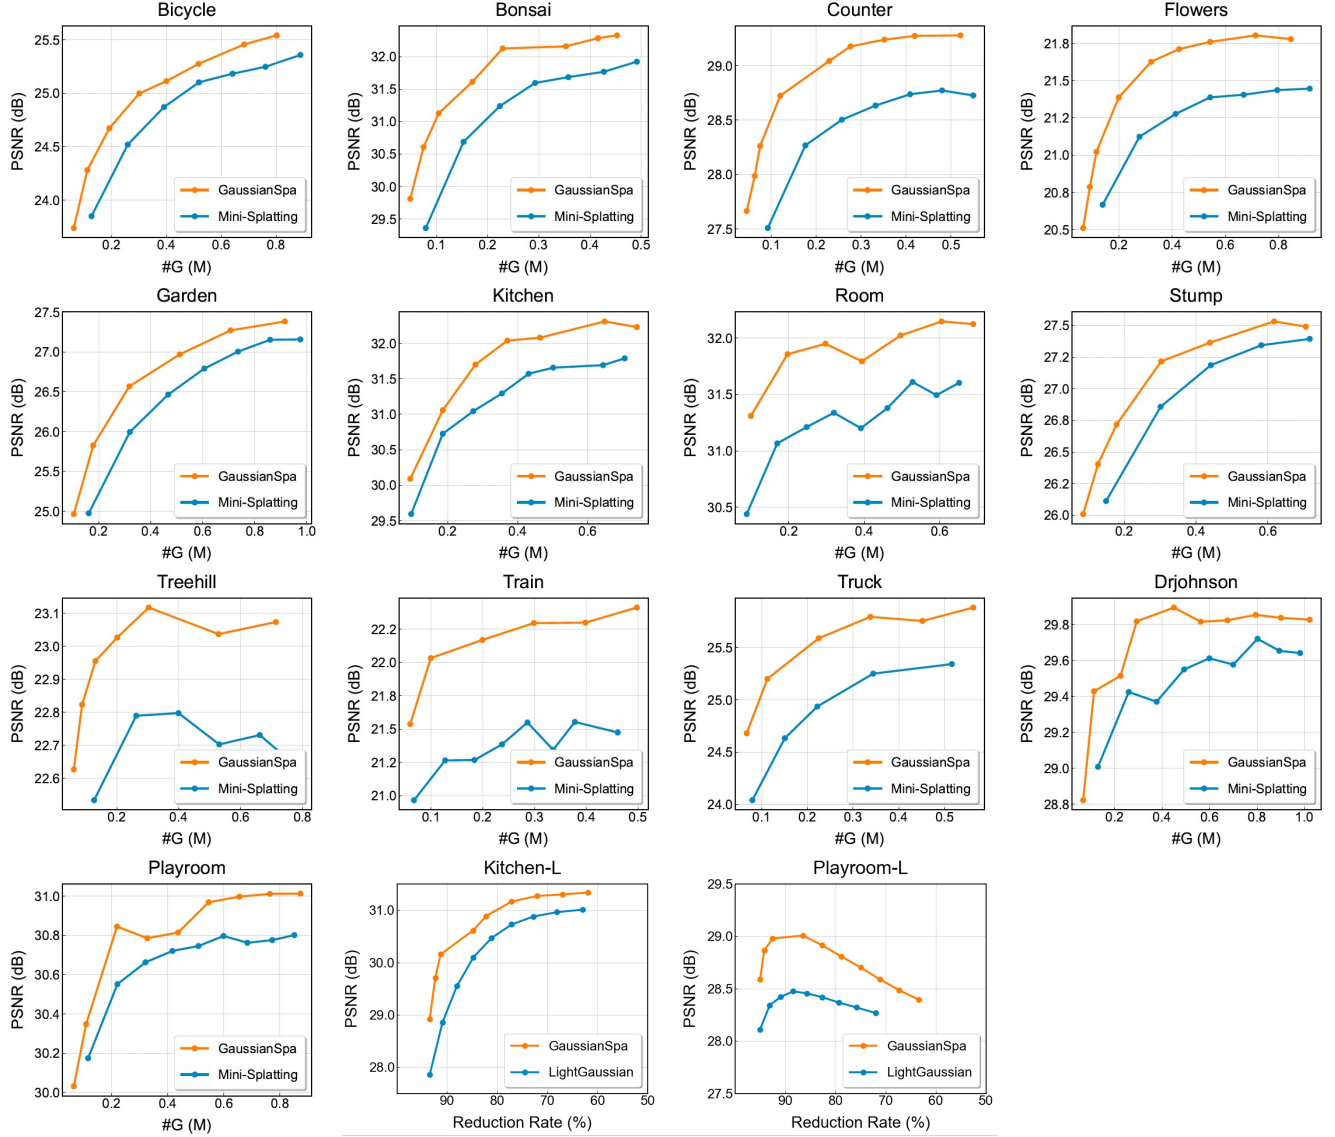

Figure 14. The first 13 sub-figures: Quality-#G (the number of Gaussians in millions) curves comparing GaussianSpa with Mini-Splatting [17] on multiple scenes. Our GaussianSpa consistently outperforms Mini-Splatting [17] with the same #G. The last two sub-figures: Quality-Reduction Rate curves comparing GaussianSpa with LightGaussian [16] on the Kitchen and Playroom scenes.

| Scene   | Method         | PSNR↑        | SSIM↑        | LPIPS↓       | # G (M)↓     |
|---------|----------------|--------------|--------------|--------------|--------------|
| Train   | 3DGS           | 21.94        | 0.810        | <b>0.200</b> | 1.110        |
|         | Mini-Splatting | 21.78        | 0.805        | 0.231        | 0.287        |
|         | GaussianSpa    | <b>22.17</b> | <b>0.815</b> | 0.228        | <b>0.199</b> |
| Truck   | 3DGS           | 25.31        | 0.880        | 0.150        | 2.540        |
|         | Mini-Splatting | 25.13        | 0.878        | 0.141        | 0.352        |
|         | GaussianSpa    | <b>25.79</b> | <b>0.888</b> | <b>0.132</b> | <b>0.338</b> |
| Average | 3DGS           | 23.63        | 0.850        | <b>0.180</b> | 1.830        |
|         | Mini-Splatting | 23.45        | 0.841        | 0.186        | 0.319        |
|         | GaussianSpa    | <b>23.98</b> | <b>0.852</b> | <b>0.180</b> | <b>0.269</b> |

Table 4. Tanks&Temples per scene results.

| Scene     | Method         | PSNR↑        | SSIM↑        | LPIPS↓       | # G (M)↓     |
|-----------|----------------|--------------|--------------|--------------|--------------|
| Drjohnson | 3DGS           | 28.77        | 0.900        | 0.250        | 3.260        |
|           | Mini-Splatting | 29.37        | 0.904        | 0.261        | 0.377        |
|           | GaussianSpa    | <b>29.89</b> | <b>0.913</b> | <b>0.243</b> | 0.450        |
|           | GaussianSpa    | 29.82        | 0.909        | 0.254        | <b>0.293</b> |
| Playroom  | 3DGS           | 30.07        | 0.900        | 0.250        | 2.290        |
|           | Mini-Splatting | 30.72        | 0.914        | <b>0.248</b> | 0.417        |
|           | GaussianSpa    | <b>30.84</b> | <b>0.916</b> | 0.254        | <b>0.219</b> |
|           | GaussianSpa    | <b>30.84</b> | <b>0.916</b> | 0.254        | <b>0.219</b> |
| Average   | 3DGS           | 29.42        | 0.900        | 0.250        | 2.780        |
|           | Mini-Splatting | 30.05        | 0.909        | 0.254        | 0.397        |
|           | GaussianSpa    | <b>30.37</b> | <b>0.914</b> | <b>0.249</b> | 0.335        |
|           | GaussianSpa    | 30.33        | 0.912        | 0.254        | <b>0.256</b> |

Table 5. Deep Blending per scene results.
